# Supplementary material for: A Novel Method for Evaluating Mobile Apps (App Rating Inventory): Development Study
Source: PubMed Central journal article supplement (PMC9055478; doi:10.2196/32643), 2022-04-15
Supplement: mhealth_v10i4e32643_app1.pdf [file mhealth_v10i4e32643_app1.pdf]

## **App Rating Inventory Checklist**

### ***EVIDENCE***

#### Medical/ Behavioral Focus:

- (a) App content focuses on a behavioral or medical concern;
- (b) Content reflects actual diagnostic nomenclature for the indicated problem;
- (c) Content is consistent with clinical recommendations/ practice guidelines.

#### Direct/ Indirect Evidence:

- (a) The app itself was involved in at least one formal study (such as a randomized controlled trial);
- (b) There is reference either in the app store or within the app, or can be ascertained by a subject expert, that the app's content is based on the empirical literature.

#### Theoretical Model:

- (a) The app's content/ interventions are based on an empirically-validated treatment model, such as cognitive-behavioral therapy.

### ***CONTENT***

#### Treatment-Focus:

- (a) The app provides information regarding types of treatment(s) that are commonly administered to reduce or prevent the problem's occurrence;
- (b) The app identifies treatments that lack empirical support and should be avoided;
- (c) The app provides skills-learning features to help ameliorate symptoms (such as a deep-breathing exercise to manage stress or low-back exercises to manage pain).

#### User-Generated Data:

- (a) The user can input responses to questionnaires/ self-assessments;
- (b) The user can input information into behavioral tracking systems (moods, activities, nutrition, glucose measures, etc.);
- (c) The user can input situational triggers/ characteristics concomitant with medical/ behavioral conditions;
- (d) The app prompts the user to input specific characteristics (age, gender, height, weight, etc.) and provides the user with tailored information;
- (e) The app can sync with user personal contacts' information
- (f) User-inputted information is storable and available from one use session to the next

#### External Links:

- (a) The app contains links/ recommendations to educational information, aid hotlines, and/or additional referral resources.
- (b) The app connects the user with social support (peer chat, social media, and/or support group platforms).

### ***CUSTOMIZABILITY***

#### Editing:

- (a) User-generated data can be systematically edited, removed/ disabled, cleared, or re-set, to include personal contact information, self-report scales, calendars, reminders/ notifications, start-up tips, and settings;

- (b) The app includes privacy settings and allows the encryption of user information and/or password protection.
- (c) Multimedia can be customized (graphical backgrounds can be varied, background music selections can be selected from an array, audio can be paused/ turned on/off).

Engagement:

- (a) The user receives extrinsic rewards during use of the app in response to achieving user-defined or app-specified milestones (gamification);
- (b) The app allows the user to integrate information within the app with the user's actual, surrounding environment (augmented reality);
- (c) The app utilizes artificial intelligence (AI chat bot, AI coach, etc.)

Ease-of-Use:

- (a) There is a main menu on the home screen;
- (b) The app provides text-based and/or video-demonstrated start-up instructions;
- (c) There is a help function that indexes and troubleshoots often-asked how-to questions;
- (d) There is an FAQ feature;
- (e) The app's buttons are organized, readable, and of sufficient size that touching a button on any given screen does not inadvertently launch an adjacent button and, when activated, the button leads to expected results.
